# Supplementary material for: Sequence-specific thermodynamic properties of nucleic acids influence both transcriptional pausing and backtracking in yeast
Source: PubMed Central journal article supplement (PMC5354634; doi:10.1371/journal.pone.0174066), 2017-03-16

Figure S1

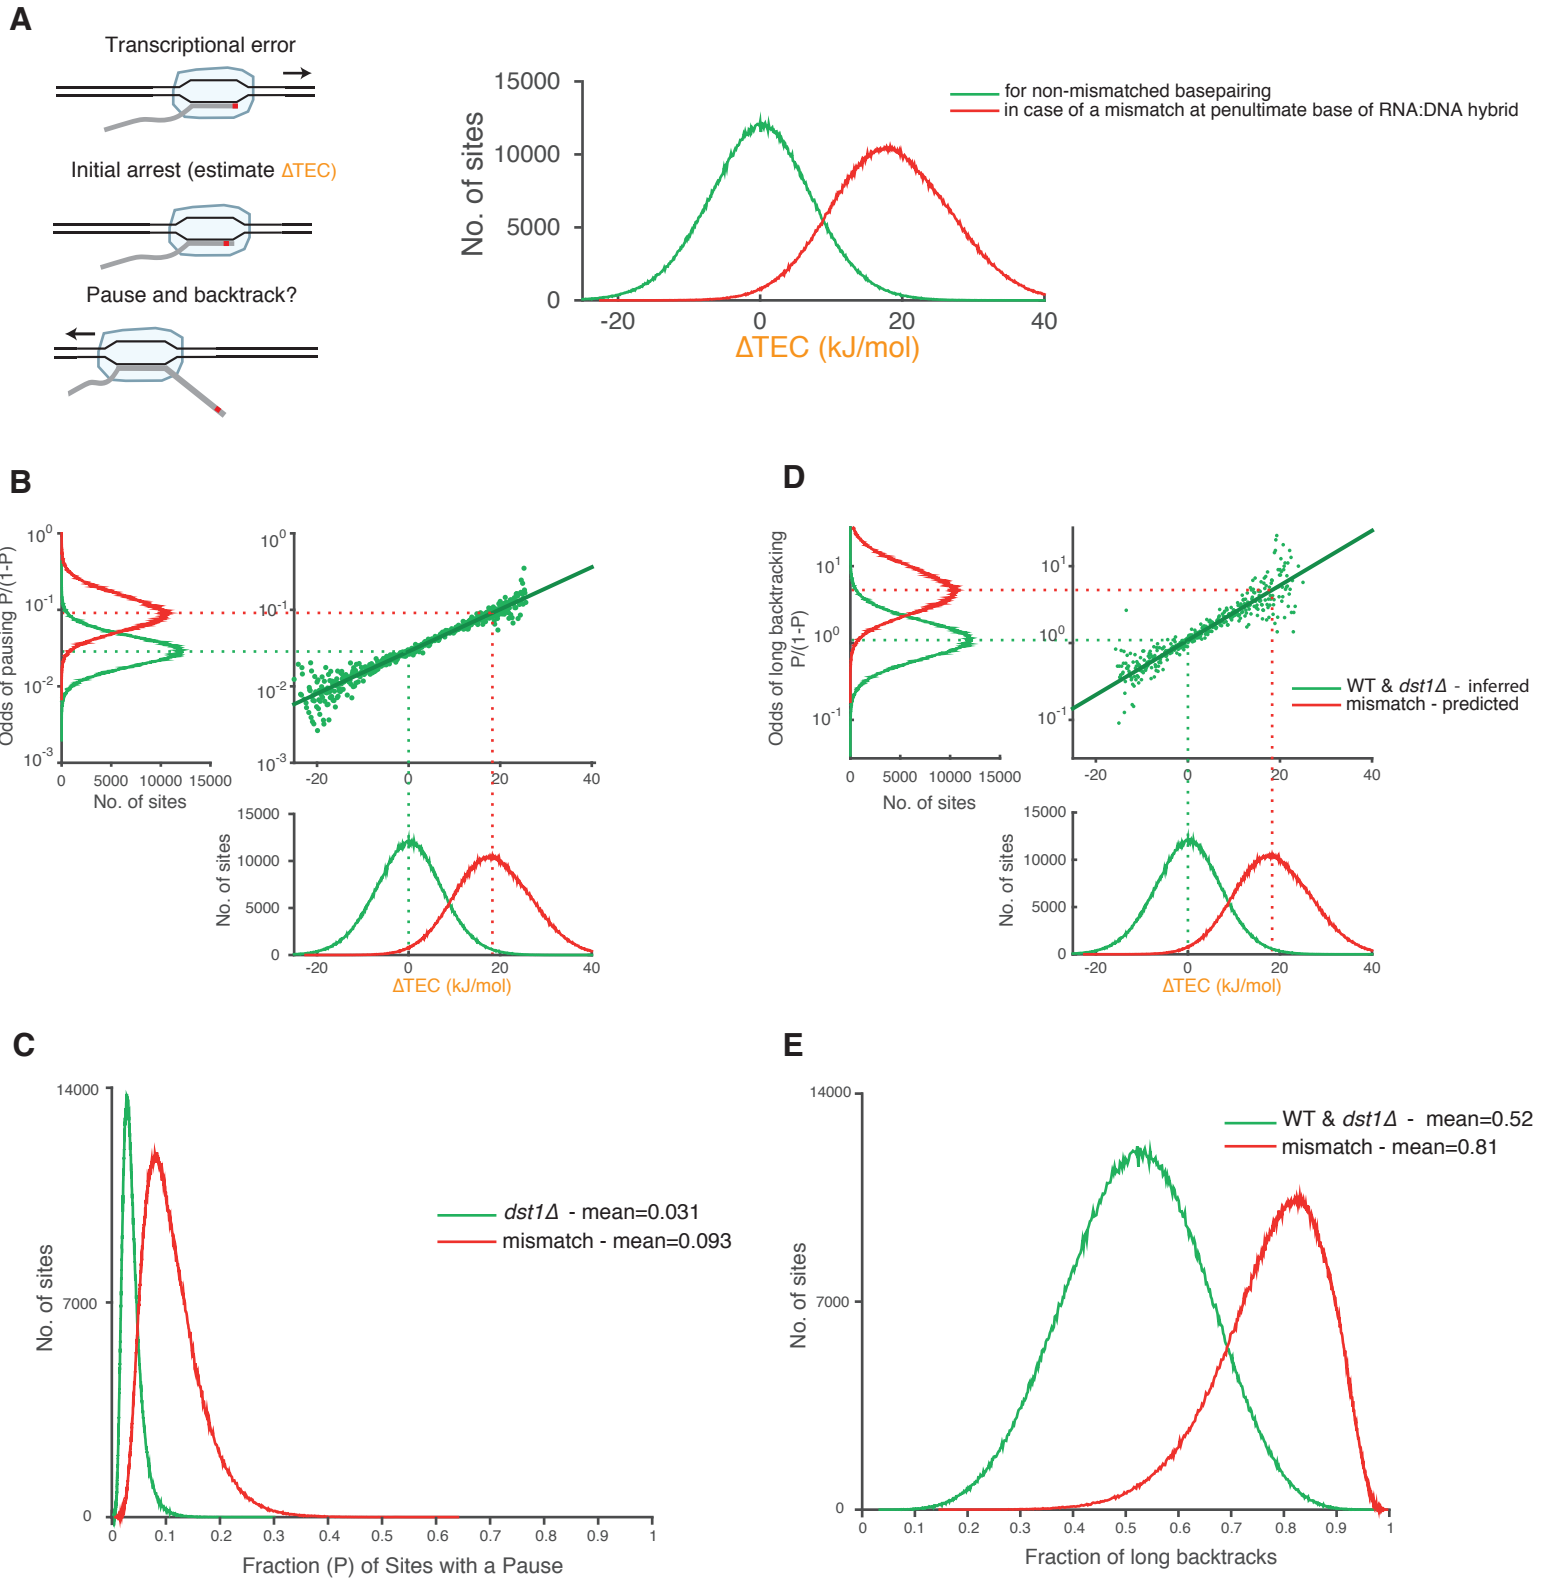

Supplement: pone.0174066.s001.pdf [file pone.0174066.s001.pdf]
