# Supplementary material for: Sequence-specific thermodynamic properties of nucleic acids influence both transcriptional pausing and backtracking in yeast
Source: PubMed Central journal article supplement (PMC5354634; doi:10.1371/journal.pone.0174066), 2017-03-16
Supplement: pone.0174066.s003.pdf [file pone.0174066.s003.pdf]

**S1 Table. Values for energy (kJ/mol) required to break a DNA:DNA basepair, used in RNAP pausing model.** Energy values were calculated for the temperature of 303 K based on nearest neighbour model from Table 2 in [25].

|                             | <b>3' base</b> | <b>A</b> | <b>C</b> | <b>G</b> | <b>T</b> |
|-----------------------------|----------------|----------|----------|----------|----------|
| <b>Nearest 5' neighbour</b> |                |          |          |          |          |
| <b>A</b>                    |                | 4.95     | 7.15     | 6.41     | 4.22     |
| <b>C</b>                    |                | 6.37     | 8.26     | 9.92     | 5.52     |
| <b>G</b>                    |                | 5.71     | 10.06    | 8.26     | 6.27     |
| <b>T</b>                    |                | 3.10     | 6.59     | 7.26     | 4.95     |
