# Supplementary material for: Sequence-specific thermodynamic properties of nucleic acids influence both transcriptional pausing and backtracking in yeast
Source: PubMed Central journal article supplement (PMC5354634; doi:10.1371/journal.pone.0174066), 2017-03-16
Supplement: pone.0174066.s004.pdf [file pone.0174066.s004.pdf]

**Table S2. Values for energy (kJ/mol) required to break an RNA:DNA basepair, used in RNAP pausing model.** Energy values were calculated for the temperature of 303 K based on nearest neighbour model from Table 3 in [26].

|                                 | <b>3' RNA base</b> | <b>A</b> | <b>C</b> | <b>G</b> | <b>U</b> |
|---------------------------------|--------------------|----------|----------|----------|----------|
| <b>Nearest 5' RNA neighbour</b> |                    |          |          |          |          |
| <b>A</b>                        |                    | 4.87     | 9.09     | 8.28     | 4.43     |
| <b>C</b>                        |                    | 4.57     | 9.50     | 8.49     | 4.31     |
| <b>G</b>                        |                    | 5.90     | 11.79    | 13.11    | 5.25     |
| <b>U</b>                        |                    | 3.22     | 6.95     | 7.51     | 1.97     |
