# Supplementary material for: Sequence-specific thermodynamic properties of nucleic acids influence both transcriptional pausing and backtracking in yeast
Source: PubMed Central journal article supplement (PMC5354634; doi:10.1371/journal.pone.0174066), 2017-03-16
Supplement: pone.0174066.s005.pdf [file pone.0174066.s005.pdf]

**Table S3. Key Numbers for the main data set**

| <b>Total number of pauses</b>                  | <b>Standard deviation above the local mean</b> |          |          |
|------------------------------------------------|------------------------------------------------|----------|----------|
|                                                | <b>2</b>                                       | <b>4</b> | <b>6</b> |
| <b>WT</b>                                      | 2578984                                        | 301363   | 64186    |
| <b><i>dst1Δ</i></b>                            | 2059994                                        | 276521   | 55043    |
| <b><i>dst1Δ</i> that are also WT (Percent)</b> | 43%                                            | 13%      | 12%      |
| <b>WT that are also <i>dst1Δ</i> (Percent)</b> | 35%                                            | 12 %     | 10%      |
